# Supplementary material
Source: publisher site journal article supplement (https://www.dovepress.com/article/103614)
Supplement: Supplementary file 1 [file get_supplementary_file.php]

## Online Supplement

### Determinants for changing the treatment of COPD: a regression analysis from a clinical audit

J. L. López-Campos <sup>1,2\*</sup>, M. Abad Arranz <sup>1</sup>, C. Calero Acuña <sup>1,2</sup>, F. Romero Valero <sup>3</sup>, R. Ayerbe García <sup>4</sup>, A. Hidalgo Molina <sup>3</sup>, R.I. Aguilar Pérez-Grovas <sup>4</sup>, F. García Gil <sup>5</sup>, F. Casas Maldonado <sup>6</sup>, L. Caballero Ballesteros <sup>5</sup>, M. Sánchez Palop <sup>6</sup>, D. Pérez-Tejero <sup>7</sup>, A. Segado <sup>7</sup>, J. Calvo Bonachera <sup>8</sup>, B. Hernández Sierra <sup>8</sup>, A. Doménech <sup>9</sup>, M. Arroyo Varela <sup>9</sup>, F. González Vargas <sup>10</sup>, J. J. Cruz Rueda <sup>10</sup>

1. Unidad Médico-Quirúrgica de Enfermedades Respiratorias, Instituto de Biomedicina de Sevilla (IBiS), Hospital Universitario Virgen del Rocío/Universidad de Sevilla, Seville, Spain
2. CIBER de Enfermedades Respiratorias (CIBERES), Instituto de Salud Carlos III, Madrid, Spain
3. Hospital Puerta del Mar, Cádiz, Spain
4. Hospital Juan Ramón Jiménez, Huelva, Spain
5. Hospital Universitario Reina Sofía, Córdoba, Spain
6. Hospital Universitario San Cecilio, Granada, Spain
7. Hospital Infanta Margarita, Cabra, Córdoba, Spain
8. Hospital Torrecárdenas, Almería, Spain
9. Hospital Regional Universitario de Málaga, Spain
10. Hospital Universitario Virgen de las Nieves, Granada, Spain

Table 1S. Bivariate analysis of factors associated with a step-up of treatment.

|                                               | No step-up<br>(n = 466) | Step-up<br>(n = 99) | P-Value* |
|-----------------------------------------------|-------------------------|---------------------|----------|
| Monographic COPD clinic                       | 187 (40.1)              | 42 (42.4)           | NS       |
| Outpatient clinic located within the hospital | 455 (97.6)              | 96 (97.0)           | NS       |
| Male gender                                   | 69 (14.8)               | 16 (16.2)           | NS       |
| Age (years)                                   | 68.4 (9.5)              | 69.4 (10.4)         | NS       |
| Rural area                                    | 135 (20.9)              | 28 (28.3)           | NS       |
| Current smoker                                | 104 (23.4)              | 27 (28.7)           | NS       |
| Tobacco history (pack-year)                   | 56.0 (32.1)             | 51.1 (25.3)         | NS       |
| Acute myocardial infraction                   | 43 (9.2)                | 15 (15.2)           | 0.099    |
| Charlson                                      | 2.1 (1.6)               | 2.2 (1.3)           | NS       |
| GesEPOC phenotype A                           | 222 (47.6)              | 37 (37.4)           | NS       |
| GesEPOC phenotype B                           | 47 (10.1)               | 12 (12.1)           | NS       |
| GesEPOC phenotype C                           | 39 (8.4)                | 7 (7.1)             | NS       |
| GesEPOC phenotype D                           | 68 (14.6)               | 17 (17.2)           | NS       |
| GOLD type A                                   | 89 (19.1)               | 20 (20.2)           | NS       |
| GOLD type B                                   | 45 (9.7)                | 14 (14.1)           | NS       |
| GOLD type C                                   | 81 (17.4)               | 16 (16.2)           | NS       |
| GOLD type D                                   | 88 (18.9)               | 20 (20.2)           | NS       |
| Dyspnea (mMRC)                                | 1.6 (1.0)               | 1.8 (0.8)           | 0.021    |
| Chronic bronchitis                            | 215 (46.1)              | 61 (61.6)           | 0.006    |
| Purulent sputum                               | 33 (7.1)                | 9 (9.1)             | NS       |
| Asthma-like symptoms                          | 77 (16.5)               | 21 (21.2)           | NS       |
| Exacerbations previous year                   | 0.8 (1.3)               | 1.3 (1.6)           | 0.004    |
| Hospitalizations previous year                | 0.2 (0.5)               | 0.2 (0.6)           | NS       |

|                                              | No step-up<br>(n = 466) | Step-up<br>(n = 99) | P-Value* |
|----------------------------------------------|-------------------------|---------------------|----------|
| Performs exercise                            | 116 (24.9)              | 23 (23.2)           | NS       |
| Influenza vaccine                            | 159 (34.1)              | 39 (39.4)           | NS       |
| Pneumococcal vaccine                         | 45 (9.7)                | 12 (12.1)           | NS       |
| Receiving non-combined LAMA                  | 408 (87.6)              | 60 (61.2)           | < 0.001  |
| Receiving non-combined tiotropium            | 330 (70.8)              | 45 (45.9)           | < 0.001  |
| Receiving non-combined aclidinium            | 60 (12.9)               | 8 (8.2)             | NS       |
| Receiving non-combined glycopyrronium        | 24 (5.2)                | 9 (9.3)             | NS       |
| Receiving non-combined LABA                  | 99 (21.2)               | 22 (22.4)           | NS       |
| Receiving non-combined salmeterol            | 1 (0.2)                 | 1 (1.0)             | NS       |
| Receiving non-combined formoterol            | 3 (0.6)                 | 0 (0)               | NS       |
| Receiving non-combined indacaterol           | 95 (20.4)               | 22 (22.4)           | NS       |
| Receiving non-combined LABA + LAMA           | 91 (19.5)               | 16 (16.2)           | NS       |
| Receiving non-combined ICS                   | 28 (6.0)                | 13 (13.1)           | 0.019    |
| Receiving combined ICS-LABA                  | 315 (67.6)              | 42 (42.4)           | < 0.001  |
| Receiving combined salmeterol-fluticasone    | 191 (41.0)              | 27 (27.3)           | 0.012    |
| Receiving combined formoterol-budesonide     | 100 (21.5)              | 11 (11.1)           | 0.018    |
| Receiving combined formoterol-beclomethasone | 25 (5.4)                | 4 (4.0)             | NS       |
| Receiving any form of ICS                    | 341 (73.2)              | 53 (53.5)           | < 0.001  |
| Receiving low dose of ICS                    | 36 (7.7)                | 8 (8.1)             | NS       |
| Receiving medium dose of ICS                 | 164 (35.2)              | 19 (19.2)           | 0.094    |
| Receiving high dose of ICS                   | 119 (25.5)              | 23 (23.2)           | NS       |
| Receiving triple therapy with LAMA+FDC       | 273 (58.6)              | 26 (26.3)           | < 0.001  |
| Receiving roflumilast                        | 55 (11.8)               | 8 (8.2)             | NS       |
| Receiving mucolytics                         | 42 (9.0)                | 3 (3.1)             | 0.062    |
| Receiving antibiotics                        | 13 (2.8)                | 0 (0)               | NS       |

|                                                             | No step-up<br>(n = 466) | Step-up<br>(n = 99) | P-Value* |
|-------------------------------------------------------------|-------------------------|---------------------|----------|
| Receiving oral methylxanthines                              | 21 (4.5)                | 3 (3.0)             | NS       |
| Receiving long-term oxygen therapy                          | 88 (18.9)               | 18 (18.2)           | NS       |
| Receiving home mechanical ventilation                       | 23 (4.9)                | 3 (3.0)             | NS       |
| Receiving nebulized home therapy                            | 17 (3.6)                | 4 (4.0)             | NS       |
| Treatment adherence evaluation                              | 255 (54.7)              | 65 (65.7)           | 0.057    |
| Inhaler device satisfaction evaluation                      | 81 (17.4)               | 20 (20.2)           | NS       |
| Adverse effects recorded                                    | 110 (23.6)              | 30 (30.3)           | NS       |
| FVC (%)                                                     | 74.9 (21.1)             | 76.5 (19.8)         | NS       |
| FEV <sub>1</sub> (%)                                        | 52.3 (20.1)             | 53.2 (18.0)         | NS       |
| FEV <sub>1</sub> increase after the bronchodilator test (%) | 7.2 (9.8)               | 9.2 (13.7)          | NS       |

Average value expressed as mean (standard deviation) or absolute (relative) frequencies depending on the nature of the variable.

\* Calculated between groups using an unpaired Student t-test or a Chi-square test, depending on the nature of the variable.

LAMA: long-acting muscarinic antagonists. LABA: long-acting  $\beta_2$  agonist. ICS: inhaled corticosteroids. FDC: fixed-dose combinations of an ICS and a LABA. FVC: forced vital capacity. FEV<sub>1</sub>: forced expiratory volume in one second.

Table 2S. Factors associated with a step-down of treatment.

|                                               | No step-down<br>(n = 510) | Step-down<br>(n = 55) | P-Value* |
|-----------------------------------------------|---------------------------|-----------------------|----------|
| Monographic COPD clinic                       | 205 (40.2)                | 24 (43.6)             | NS       |
| Outpatient clinic located within the hospital | 497 (97.5)                | 54 (98.2)             | NS       |
| Male gender                                   | 81 (15.9)                 | 4 (7.3)               | NS       |
| Age (years)                                   | 68.7 (9.8)                | 68.0 (8.3)            | NS       |
| Rural area                                    | 363 (71.2)                | 39 (70.9)             | NS       |
| Current smoker                                | 133 (26.7)                | 9 (16.4)              | NS       |
| Tobacco history (pack-year)                   | 54.0 (30.0)               | 65.7 (38.3)           | 0.011    |
| Depression                                    | 47 (9.2)                  | 9 (16.4)              | 0.098    |
| Charlson                                      | 2.1 (1.5)                 | 1.9 (1.5)             | NS       |
| GesEPOC phenotype A                           | 231 (45.3)                | 28 (50.9)             | 0.020    |
| GesEPOC phenotype B                           | 57 (11.2)                 | 2 (3.6)               | 0.049    |
| GesEPOC phenotype C                           | 44 (8.6)                  | 2 (3.6)               | 0.082    |
| GesEPOC phenotype D                           | 79 (15.5)                 | 6 (10.9)              | NS       |
| GOLD type A                                   | 93 (18.2)                 | 16 (29.1)             | 0.031    |
| GOLD type B                                   | 55 (10.8)                 | 4 (7.3)               | NS       |
| GOLD type C                                   | 88 (17.3)                 | 9 (16.4)              | NS       |
| GOLD type D                                   | 104 (20.4)                | 4 (7.3)               | 0.062    |
| Dyspnea (mMRC)                                | 1.7 (1.0)                 | 1.4 (0.9)             | NS       |
| Chronic bronchitis                            | 253 (49.6)                | 23 (41.8)             | NS       |
| Purulent sputum                               | 38 (7.5)                  | 4 (7.3)               | NS       |
| Asthma-like symptoms                          | 95 (18.6)                 | 3 (5.5)               | 0.036    |
| Exacerbations previous year                   | 0.9 (1.3)                 | 0.8 (1.5)             | NS       |
| Hospitalizations previous year                | 0.2 (0.6)                 | 0.2 (0.6)             | NS       |

|                                              | No step-down<br>(n = 510) | Step-down<br>(n = 55) | P-Value* |
|----------------------------------------------|---------------------------|-----------------------|----------|
| Performs exercise                            | 125 (38.0)                | 14 (40.0)             | NS       |
| Influenza vaccine                            | 180 (35.3)                | 18 (32.7)             | NS       |
| Pneumococcal vaccine                         | 52 (10.2)                 | 5 (9.1)               | NS       |
| Receiving non-combined LAMA                  | 420 (82.5)                | 48 (87.3)             | NS       |
| Receiving non-combined tiotropium            | 335 (65.8)                | 40 (72.7)             | NS       |
| Receiving non-combined acclidinium           | 62 (12.2)                 | 6 (10.9)              | NS       |
| Receiving non-combined glycopyrronium        | 31 (6.1)                  | 2 (3.6)               | NS       |
| Receiving non-combined LABA                  | 107 (21.0)                | 14 (25.5)             | NS       |
| Receiving non-combined salmeterol            | 1 (0.2)                   | 1 (1.8)               | NS       |
| Receiving non-combined formoterol            | 2 (0.4)                   | 1 (1.8)               | NS       |
| Receiving non-combined indacaterol           | 105 (20.7)                | 12 (21.8)             | NS       |
| Receiving non-combined LABA + LAMA           | 94 (18.4)                 | 13 (23.6)             | NS       |
| Receiving non-combined ICS                   | 35 (6.9)                  | 6 (10.9)              | NS       |
| Receiving combined ICS-LABA                  | 314 (61.6)                | 43 (78.2)             | 0.018    |
| Receiving combined salmeterol-fluticasone    | 188 (36.9)                | 30 (54.5)             | 0.013    |
| Receiving combined formoterol-budesonide     | 101 (19.8)                | 10 (18.2)             | NS       |
| Receiving combined formoterol-beclomethasone | 26 (5.1)                  | 3 (5.5)               | NS       |
| Receiving any form of ICS                    | 345 (67.6)                | 49 (89.1)             | 0.001    |
| Receiving low dose of ICS                    | 39 (7.6)                  | 5 (9.1)               | NS       |
| Receiving medium dose of ICS                 | 153 (30.0)                | 30 (54.5)             | 0.027    |
| Receiving high dose of ICS                   | 131 (25.7)                | 11 (20.0)             | 0.035    |
| Receiving triple therapy with LAMA+FDC       | 263 (51.6)                | 36 (65.5)             | 0.064    |
| Receiving roflumilast                        | 57 (11.2)                 | 6 (10.9)              | NS       |
| Receiving mucolytics                         | 37 (7.3)                  | 8 (14.5)              | 0.068    |
| Receiving antibiotics                        | 9 (1.8)                   | 4 (7.3)               | 0.030    |

|                                                             | No step-down<br>(n = 510) | Step-down<br>(n = 55) | P-Value* |
|-------------------------------------------------------------|---------------------------|-----------------------|----------|
| Receiving oral methylxanthines                              | 16 (3.1)                  | 8 (14.5)              | 0.001    |
| Receiving long-term oxygen therapy                          | 103 (20.2)                | 3 (5.5)               | 0.006    |
| Receiving home mechanical ventilation                       | 26 (5.1)                  | 0 (0)                 | 0.097    |
| Receiving nebulized home therapy                            | 19 (3.7)                  | 2 (3.6)               | NS       |
| Treatment adherence evaluation                              | 284 (55.7)                | 36 (65.5)             | NS       |
| Inhaler device satisfaction evaluation                      | 88 (17.3)                 | 13 (23.6)             | NS       |
| Adverse effects recorded                                    | 123 (24.1)                | 17 (30.9)             | NS       |
| FVC (%)                                                     | 74.9 (20.9)               | 78.2 (20.7)           | NS       |
| FEV <sub>1</sub> (%)                                        | 51.7 (19.2)               | 60.2 (22.3)           | 0.057    |
| FEV <sub>1</sub> increase after the bronchodilator test (%) | 7.7 (11.1)                | 7.4 (7.5)             | NS       |

Average value expressed as mean (standard deviation) or absolute (relative) frequencies depending on the nature of the variable.

\*Calculated between groups using an unpaired Student t-test or a Chi-square test, depending on the nature of the variable.

LAMA: long-acting muscarinic antagonists. LABA: long-acting  $\beta_2$  agonist. ICS: inhaled corticosteroids. FDC: fixed-dose combinations of an ICS and a LABA. FVC: forced vital capacity. FEV<sub>1</sub>: forced expiratory volume in one second.

Table 3S. Bivariate analysis indicating factors associated with discontinuing inhaled steroids.

|                                               | No ICS<br>withdrawal<br>(n = 355) | ICS<br>withdrawal<br>(n = 39) |         |
|-----------------------------------------------|-----------------------------------|-------------------------------|---------|
| Monographic COPD clinic                       | 146 (41.1)                        | 15 (38.9)                     | NS      |
| Outpatient clinic located within the hospital | 348 (98.0)                        | 38 (97.4)                     | NS      |
| Male gender                                   | 301 (84.8)                        | 32 (82.1)                     | NS      |
| Age (years)                                   | 69.2 (9.7)                        | 67.3 (8.6)                    | NS      |
| Rural area                                    | 117 (33.0)                        | 11 (28.2)                     | NS      |
| Current smoker                                | 82 (23.1)                         | 9 (23.1)                      | NS      |
| Tobacco history (pack-year)                   | 55.1 (31.8)                       | 61.6 (41.3)                   | NS      |
| Diabetes                                      | 78 (22.0)                         | 3 (7.7)                       | 0.037   |
| Depression                                    | 33 (9.3)                          | 8 (20.5)                      | 0.047   |
| Anxiety                                       | 33 (9.3)                          | 7 (17.9)                      | 0.096   |
| Charlson                                      | 2.2 (1.6)                         | 2.0 (1.7)                     | NS      |
| GesEPOC phenotype A                           | 132 (37.2)                        | 21 (53.8)                     | 0.013   |
| GesEPOC phenotype B                           | 49 (13.8)                         | 2 (5.1)                       | NS      |
| GesEPOC phenotype C                           | 31 (8.7)                          | 1 (2.6)                       | NS      |
| GesEPOC phenotype D                           | 70 (19.7)                         | 4 (10.3)                      | NS      |
| GOLD type A                                   | 36 (54.4)                         | 11 (28.2)                     | < 0.001 |
| GOLD type B                                   | 37 (10.4)                         | 2 (5.1)                       | NS      |
| GOLD type C                                   | 67 (18.9)                         | 6 (15.4)                      | NS      |
| GOLD type D                                   | 89 (25.1)                         | 3 (7.7)                       | 0.020   |
| Dyspnea (mMRC)                                | 1.8 (0.9)                         | 1.4 (0.9)                     | 0.032   |
| Chronic bronchitis                            | 186 (52.4)                        | 16 (41.0)                     | NS      |



|                                              | No ICS<br>withdrawal<br>(n = 355) | ICS<br>withdrawal<br>(n = 39) |       |
|----------------------------------------------|-----------------------------------|-------------------------------|-------|
| Purulent sputum                              | 36 (10.1)                         | 1 (2.6)                       | NS    |
| Asthma-like symptoms                         | 75 (21.1)                         | 3 (7.7)                       | 0.011 |
| Exacerbations previous year                  | 1.1 (1.4)                         | 0.6 (0.8)                     | 0.035 |
| Hospitalizations previous year               | 0.3 (0.6)                         | 0.3 (0.7)                     | NS    |
| Performs exercise                            | 83 (23.4)                         | 10 (25.6)                     | NS    |
| Influenza vaccine                            | 137 (38.6)                        | 15 (38.5)                     | NS    |
| Pneumococcal vaccine                         | 44 (12.4)                         | 2 (5.1)                       | 0.060 |
| Receiving non-combined LAMA                  | 301 (84.8)                        | 28 (71.8)                     | 0.065 |
| Receiving non-combined Tiotropium            | 250 (70.4)                        | 23 (59.0)                     | NS    |
| Receiving non-combined aclidinium            | 40 (11.3)                         | 5 (12.8)                      | NS    |
| Receiving non-combined glycopyrronium        | 14 (3.9)                          | 0 (0)                         | NS    |
| Receiving non-combined LABA                  | 25 (7.0)                          | 7 (17.9)                      | 0.028 |
| Receiving non-combined salmeterol            | 2 (0.6)                           | 0 (0)                         | NS    |
| Receiving non-combined formoterol            | 0 (0)                             | 1 (2.6)                       | 0.099 |
| Receiving non-combined indacaterol           | 24 (6.8)                          | 6 (15.4)                      | NS    |
| Receiving non-combined LABA + LAMA           | 20 (5.6)                          | 6 (15.4)                      | 0.033 |
| Receiving non-combined ICS                   | 35 (9.9)                          | 6 (15.4)                      | NS    |
| Receiving combined ICS-LABA                  | 324 (91.3)                        | 33 (84.6)                     | NS    |
| Receiving combined salmeterol-fluticasone    | 193 (54.4)                        | 25 (64.1)                     | NS    |
| Receiving combined formoterol-budesonide     | 105 (29.6)                        | 6 (15.4)                      | 0.063 |
| Receiving combined formoterol-beclomethasone | 27 (7.6)                          | 2 (5.1)                       | NS    |
| Receiving low dose of ICS                    | 38 (10.7)                         | 6 (15.4)                      | NS    |
| Receiving medium dose of ICS                 | 161 (45.4)                        | 22 (56.4)                     | NS    |
| Receiving high dose of ICS                   | 133 (37.5)                        | 9 (23.1)                      | NS    |

|                                                 | No ICS<br>withdrawal<br>(n = 355) | ICS<br>withdrawal<br>(n = 39) |       |
|-------------------------------------------------|-----------------------------------|-------------------------------|-------|
| Receiving triple therapy with LAMA+FDC          | 277 (78.0)                        | 22 (56.4)                     | 0.005 |
| Receiving roflumilast                           | 51 (14.4)                         | 2 (5.1)                       | NS    |
| Receiving mucolytics                            | 30 (8.5)                          | 6 (15.4)                      | NS    |
| Receiving antibiotics                           | 10 (2.8)                          | 1 (2.6)                       | NS    |
| Receiving oral methylxanthines                  | 18 (5.1)                          | 1 (2.6)                       | NS    |
| Receiving long-term oxygen therapy              | 77 (21.7)                         | 1 (2.6)                       | 0.002 |
| Receiving home mechanical ventilation           | 21 (5.9)                          | 0 (0)                         | NS    |
| Receiving nebulized home therapy                | 17 (4.8)                          | 1 (2.6)                       | NS    |
| Treatment adherence evaluation                  | 200 (56.3)                        | 24 (61.5)                     | NS    |
| Inhaler device satisfaction evaluation          | 62 (17.5)                         | 6 (15.4)                      | NS    |
| Adverse effects recorded                        | 97 (27.3)                         | 9 (23.1)                      | NS    |
| FVC (%)                                         | 71.8 (19.0)                       | 78.0 (21.2)                   | NS    |
| FEV1 (%)                                        | 47.6 (16.9)                       | 59.8 (22.2)                   | 0.016 |
| FEV1 increase after the bronchodilator test (%) | 7.8 (10.2)                        | 6.0 (6.7)                     | NS    |

Average values are expressed as means (standard deviation) or absolute (relative) frequencies depending on the nature of the variable.

\*Calculated between groups using an unpaired Student t-test or a Chi-square test, depending on the nature of the variable.

LAMA: long-acting muscarinic antagonists. LABA: long-acting  $\beta_2$  agonist. ICS: inhaled corticosteroids. FDC: fixed-dose combinations of an ICS and a LABA. FVC: forced vital capacity. FEV<sub>1</sub>: forced expiratory volume in one second.
